# Supplementary material
Source: PubMed Central journal article supplement (PMC4787988)
Supplement: phuj839456.ww1_default.pdf [file phuj839456.ww1_default.pdf]

**Appendix 1 Table A** Minimum facilities and equipment required to achieve bundle targets [posted as supplied by author]

ALI= acute lung injury; APACHE=Acute Physiology and Chronic Health Evaluation; ARDS=acute respiratory distress syndrome; CVP=central venous pressure; ED=emergency department; PBW=predicted body weight; ScvO<sub>2</sub>=central venous oxygen saturation; SvO<sub>2</sub>=mixed venous oxygen saturation.

| <b>Target</b>                                                            | <b>Facilities and equipment required</b>                                                                                                                                                                        |
|--------------------------------------------------------------------------|-----------------------------------------------------------------------------------------------------------------------------------------------------------------------------------------------------------------|
| <b>Resuscitation bundle (first 6h)</b>                                   |                                                                                                                                                                                                                 |
| Measure lactate                                                          | Point-of-care lactate analysers<br>Or central laboratory lactate analysers with rapid turnaround                                                                                                                |
| Blood cultures before antibiotics                                        | Blood culture media                                                                                                                                                                                             |
| Broad-spectrum antibiotics within 3h for ED admissions and 1h for others | Antibiotics<br>Intravenous injection or infusion sets                                                                                                                                                           |
| Fluids (20 mL/kg of crystalloids or equivalent)±vasopressors             | Fluids<br>Vasopressors<br>Intravenous infusion sets                                                                                                                                                             |
| CVP≥8 mm Hg                                                              | Central venous catheterisation sets<br>Pressure transducers or manometers<br>Fluids<br>Intravenous infusion sets                                                                                                |
| ScvO <sub>2</sub> ≥70% or SvO <sub>2</sub> ≥65%                          | Central venous or pulmonary artery catheterisation sets<br>Fibreoptic catheters with in vivo spectrophotometry<br>Or blood gas analysers with co-oximetry<br>Packed red blood cells or whole blood<br>Inotropes |
| <b>Management bundle (first 24h)</b>                                     |                                                                                                                                                                                                                 |
| Low-dose steroids administered or considered                             | Steroids<br>Intravenous injection or infusion sets                                                                                                                                                              |
| Drotrecogin alfa (activated) administered or considered                  | Drotrecogin alfa (activated)<br>Intravenous infusion sets                                                                                                                                                       |
| Glucose≥4.5 and ≤10.0 mmol/L at 6-24h                                    | Point-of-care glucometers<br>Or central laboratory glucose analysers with rapid turnaround                                                                                                                      |
| Tidal volume≤6 mL/kg predicted body weight                               | Mechanical ventilators                                                                                                                                                                                          |
