# Supplementary material
Source: PubMed Central journal article supplement (PMC4787988)
Supplement: phuj839456.ww2_default.pdf [file phuj839456.ww2_default.pdf]

## **Appendix 2: The MOSAICS Study Group [posted as supplied by author]**

**Steering and writing committee:** Jason Phua, Younsuck Koh, Bin Du, Yao-Qing Tang, Jigeeshu V Divatia, Cheng Cheng Tan, Charles D Gomersall, Mohammad Omar Faruq, Babu Raja Shrestha, Gia Binh Nguyen, Yaseen M Arabi, Nawal Salahuddin, Bambang Wahyuprajitno, Mei-Lien Tu, Ahmad Yazid Haji Abd Wahab, Akmal A Hameed, Masaji Nishimura, Mark Procyshyn, Yiong Huak Chan.

**Data and clinical coordination:** Xiang-Yu Zhang, Bisharad M Shrestha, Abdul Diab, Meng-Chih Lin.

### **Participating centres:**

**Bahrain:** Salmaniya Medical Complex (Akmal A Hameed).

**Bangladesh:** Apollo Hospitals (Lutful Aziz); Aysha Memorial Hospital (Kaniz Fatema); Bangabandhu Sheikh Mujib Medical University (A K Qumrul Huda); Bangladesh Medical College & Hospital (Mohammad Faruk); BIRDEM Hospital Dhaka (Mohammad Omar Faruq); Combined Military Hospital, Dhaka (M H M Delwar Hossain); Dhaka Medical College & Hospital (U H Shahera Khatun); Holy Family Red Crescent Medical College & Hospital (M A Mannan); Ibn Sina Hospital (A S M Areef Ahsan); Islami Bank Central Hospital (Rownak Jahan Tamanna); Lab Aid Specialized Hospital (Md Sayedul Islam); Renaissance Hospital (PVT) Limited (Fatema Ahmed); Square Hospital (A R M Nooruzzaman); United Hospital (Md Maniruzzaman).

**Brunei:** RIPAS Hospital (Ahmad Yazid Haji Abd Wahab).

**China:** Beijing Aerospace General Hospital (Chun-Liang Yan); Beijing Anzhen Hospital (Yu-Hong Mi); Beijing Tongren Hospital (Yuan Xu); China-Japan Friendship Hospital (Li Yi); Fengrun County Hospital (Zhi-Xiang Li); First Affiliated Hospital of Dalian Medical University (Xian-Yao Wan); First Affiliated Hospital of Medical College of Xi'an Jiaotong University (Xue Wang); Fujian Provincial Hospital (Song-Jing Shi); Guangdong General Hospital (Shou-Hong Wang); Haining Municipal People's Hospital (Juan-Xian Gu); Heilongjiang Nongken General Hospital (Ping Xu); First Affiliated Hospital of Henan University of Science & Technology (Guo-Xie Zhang, Ying-Ying Hu); Jiangxi Provincial Hospital (Zhi Chen); Nantong Third People's Hospital (Xu-Dong Han); Peking Union Medical College Hospital (Bin Du); PLA Navy General Hospital (Yu-Hong Liu); Shaanxi Xianyang Central Hospital (Ying Duan); Shanghai Changzheng Hospital (De-Chang Chen); Shanghai East Hospital (Shao-Lin Ma); Shanghai First People's Hospital (Kang-Long Yu); Shanghai Huadong Hospital (Xiao-Hua Song); Shanghai Huashan Hospital (Tong-Wa Cao); Shanghai Jinshan Hospital (Jie Shen); Shanghai Ruijin Hospital (Hong-Ping Qu); Shanghai Tenth People's Hospital (Xiang-Yu Zhang); Shenzhen People's Hospital (Huai-Sheng Chen); Sichuan Provincial People's Hospital (Xiao-Bo Huang); Suzhou University First Hospital (Jian-Hong Fu); The Fifth People's Hospital of Shanghai (Jian-Guo Tang); The First Affiliated Hospital of Kunming Medical College (Chuan-Yun Qian); Tianjin Armed Police Medical College Hospital (Shi-Zhong Sun); Wuxi People's Hospital (Hong-Yang Xu); Wuxi No. 2 People's Hospital (Dong-Hui

Jiang); Xinhua Hospital Affiliated to Shanghai Jiaotong University (Shu-Yun Wang); Xinxing County Hospital (Wen-Da Huang); Yangquan Mineral Bureau Hospital (Qi-Ming Liang); Zhejiang Provincial Hospital (Ren-Hua Sun); Zhongda Hospital, Southeast University (Xiao-Min Lu); Zhongnan Hospital (Jian-Guo Li); Zhongshan Hospital Fudan University (Du-Ming Zhu).

**Hong Kong:** Caritas Medical Centre (Fu Loi Chow); North District Hospital (Claudia Cheng); Pamela Youde Nethersole Eastern Hospital (H P Shum); Prince of Wales Hospital (Charles Gomersall); Queen Elizabeth Hospital (Anne Leung); Queen Mary Hospital (Karl Young).

**India:** AMRI Hospital (Subhash Todi); Apollo First Med Hospital (Ashwin Kumar Mani); Apollo Main Hospital (Babu K Abraham, N Ramakrishnan); Artemis Health Institute (Deepak Govil); Care Hospital (Srinivas Samavedam); Christian Medical College (Shoma V Rao); Deenanath Mangeshkar Hospital (Sameer Jog); Jehangir Hospital (Shiva Kumar Iyer); King Edward Memorial Hospital (B D Bande); Kalinga Hospital (Samir Sahu); Sigma Hospital (Shyam Sunder Tipparaju); Manipal Hospital (Somnath Chatterjee); PD Hinduja National Hospital (Farhad Kapadia); Ruby Hall Clinic (Shilpa Kulkarni); Saifee Hospital (C K Jani, M H Patel); Sir Gangaram Hospital (Prakash Shastri, Sameer Saikia); Tata Memorial Hospital (Nayana Amin, Jigeeshu Divatia).

**Indonesia:** RS Adam Malik, Medan (Achsannudin Hanafie); RS Mayapada, Jakarta (Rudy Manalu); RS Umum Dr Soetomo, Surabaya (Bambang Wahjuprajitno, Tommy Sunartomo); RS Wahidin Sudirohusodo, Makassar (Syafri K Arif); RSU Sanglah (I Wayan Suranadi); RSUPN Cipto Mangunkusumo (Rudyanto Sedono).

**Japan:** Tokushima University Hospital (Masaji Nishimura).

**Malaysia:** Hospital Alor Setar (Ahmad Shaltut Othman); Hospital Kuala Lumpur (Li Ling Tai); Hospital Kuala Terengganu (Mohd Ridhwan Mohd Noor); Hospital Melaka (Anita Alias); Hospital Pulau Pinang (Chew Har Lim); Hospital Sultanah Aminah (Cheng Cheng Tan); Hospital Sungai Buloh (Shanthi Ratnam); Hospital Taiping (AsNiza Abdul Shukor); Hospital Tuanku Jaafar (Jenny May Geok Tong); Hospital Universiti Kebangsaan Malaysia (Raha Abdul Rahman).

**Nepal:** Kathmandu Medical College Teaching Hospital (Babu Raja Shrestha); Om Hospital and Research Centre (Shyam Krishna Maharjan).

**Pakistan:** Aga Khan University Karachi (Nawal Salahuddin); Liaquat National Hospital Karachi (Zafar Ahmed); Ziauddin Medical University Karachi (Asim Noor).

**Saudi Arabia:** King Abdulaziz Medical City, Riyadh (Hasan Al-Dorzi); King Abdulaziz Medical City, Riyadh (Yaseen M Arabi); King Fahad Medical City, Riyadh (Ali Al Azem); King Faisal Specialist Hospital & Research Center, Jeddah (Ismael Qushmag); Riyadh Armed Forces Hospital, Riyadh (Yasser Mandourah).

**Singapore:** Khoo Teck Puat Hospital (Azman Johan, Naville Chia); Changi General Hospital (Augustine Tee, Huae Min Tham); National University Hospital (Dipika Agrawal, Addy Yong Hui Tan); Singapore General Hospital (Kenneth Ping-Wah Chan, Chai Rick Soh); Tan Tock Seng Hospital ( Benjamin Choon-Heng Ho, Shi Loo).

**South Korea:** Ajou University Hospital (Young Joo Lee); Asan Medical Center (Younsuck Koh, Suk Kyung Hong); Catholic University of Daegu Hospital (Kyung Chan Kim); Chuncheon Sacred Heart Hospital, Hallym University Medical Center (Myung Goo Lee); Chung-Ang University Hospital (Jae Yeol Kim); Chungbuk National University Hospital (Ki Man Lee), Chungju Hospital, Konkuk University (Gyu Rak Chon); Chungnam National University Hospital (Hee Sun Park); Dong-A University Hospital (Soo Jung Um); Dongguk University Hospital (Hye Sook Choi); Ewha Womans University Mokdong Hospital (Jin Hwa Lee); Hallym University Medical Center (Ki Suck Jung); Han Yang University Guri Hospital (Tae Hyung Kim); Ilsan Paik Hospital, Inje University (Sung Soon Lee); Inha University Hospital (Jae Hwa Cho); Konkuk University Hospital (Kyoung Min Lee); Korea University Anam Hospital (Choon Hak Lim); Korea University Ansan Hospital (Je Hyeong Kim); Kwandong University Myongji Hospital (Jung Eun Choi); Pusan National University Hospital (Yun Seong Kim); Seoul St Mary's Hospital (Seok Chan Kim); Severance Hospital (Shin Ok Koh, Moo Suk Park); Ulsan University Hospital (Kwang Won Seo); Wonju Christian Hospital (Won Yeon Lee); Wonkwang University Hospital (Sei Hoon Yang).

**Taiwan:** Chang Gung Memorial Hospital, Chang Gung University, Kaohsiung (Wen-Feng Fang, Kuo-Tung Huang).

**Vietnam:** Bach Mai Hospital (Gia Binh Nguyen, Xuan Co Dao, Dang Tuan Nguyen); Cho Ray Hospital (Thi Ngoc Thao Pham, Thi Xuan Phan, Ngoc Hai Truong); Viet Tiep Hospital (Thanh Cang Tran).
